# Supplementary material for: A TiO2/C catalyst having biomimetic channels and extremely low Pt loading for formaldehyde oxidation
Source: Royal Society of Chemistry journal article supplement (doi:10.1039/c8ra10314c), 2019-01-01
Supplement: c8ra10314c1.pdf [file c8ra10314c1.pdf]

## Supplementary information

### Biomimetic channelled TiO<sub>2</sub>/C catalyst with extremely low Pt loading for formaldehyde oxidation

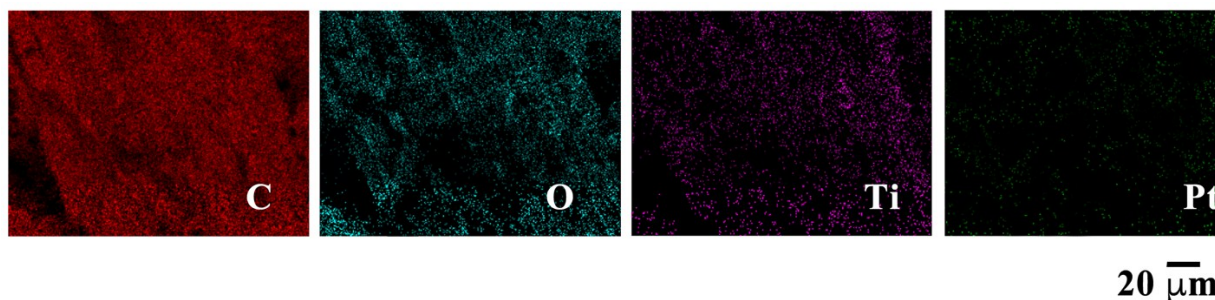

**Figure S1.** EDS elemental mapping of C, Ti, O, Pt for obtained TiO<sub>2</sub>/C material (SEM image is shown in manuscript Fig.2 A).

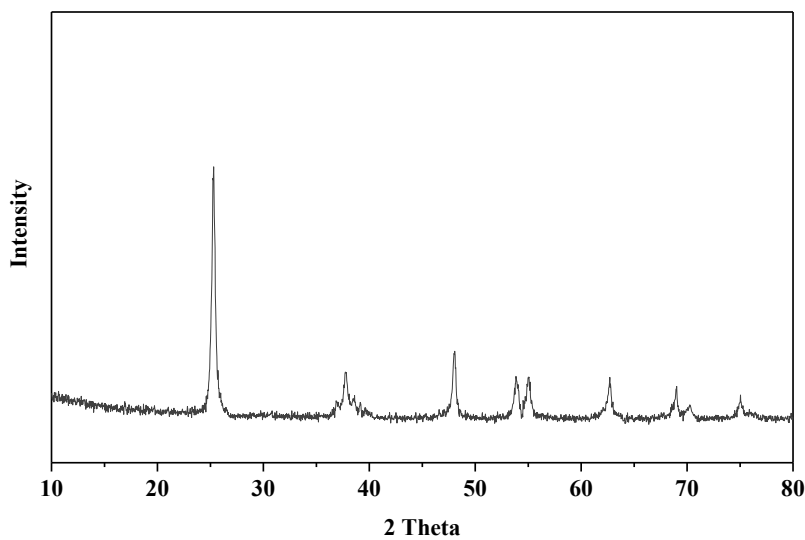

**Figure S2.** XRD pattern of sol-gel prepared TiO<sub>2</sub> without wood template. The result indicates the anatase phase of TiO<sub>2</sub>.

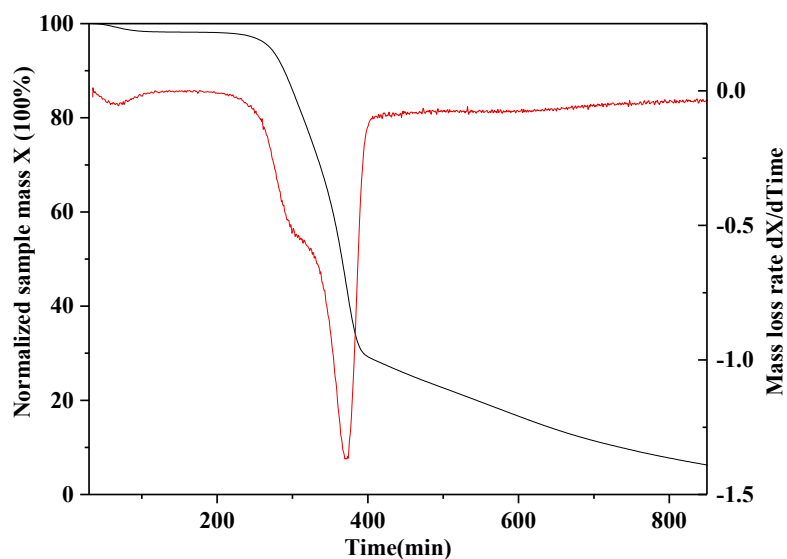

**Figure S3.** TGA curve of original wood chip without Ti and Pt precursor loading.

**Table S1** Pt content determination in samples by ICP-MS

| Samples*           | Sample weight (mg) | Pt (mg) | Pt content (%) |
|--------------------|--------------------|---------|----------------|
| #1(400°C)          | 15.2               | 0.014   | 0.092          |
| #2(500°C)          | 12.8               | 0.012   | 0.095          |
| #3(600°C)          | 11.5               | 0.011   | 0.098          |
| #4(400°C-1)        | 18.5               | 0.012   | 0.063          |
| #5(400°C-2)        | 25.1               | 0.010   | 0.041          |
| #6(sol-gel method) | 16.3               | 0.018   | 0.112          |

\*The temperature noted in brackets are calcination temperature in the preparation.

**Table S2** Surface area ( $S_{\text{BET}}$ ), pore volume ( $V_{\text{pore}}$ ) and pore size ( $d_{\text{pore}}$ ) distribution of prepared porous  $\text{TiO}_2/\text{C}$  material

| Temp. (°C) | $S_{\text{BET}}$ ( $\text{m}^2 \text{g}^{-1}$ ) | $V_{\text{pore}}$ ( $\text{cm}^3 \text{g}^{-1}$ ) | $d_{\text{pore}}$ (nm) |
|------------|-------------------------------------------------|---------------------------------------------------|------------------------|
| 400        | 41.5                                            | 0.055                                             | 2-10; 12-18            |
| 500        | 24.1                                            | 0.037                                             | 2-10                   |
| 600        | 30.0                                            | 0.037                                             | 2-10                   |
